# Supplementary material for: Biocide mechanism of highly efficient and stable antimicrobial surfaces based on zinc oxide–reduced graphene oxide photocatalytic coatings
Source: Royal Society of Chemistry journal article supplement (doi:10.1039/d0tb01428a), 2020-01-01
Supplement: d0tb01428a1.pdf [file d0tb01428a1.pdf]

## Supplementary Information

### **Biocide mechanism of highly efficient and stable antimicrobial surfaces based on zinc oxide-reduced graphene oxide photocatalytic coatings**

Laura Valenzuela<sup>1,\*</sup>, Ana Iglesias-Juez<sup>2,\*</sup>, Belén Bachiller-Baeza<sup>2</sup>, Marisol Faraldos<sup>2</sup>,  
Ana Bahamonde<sup>2</sup>, Roberto Rosal<sup>1</sup>

1 Department of Chemical Engineering, University of Alcalá, E-28871 Alcalá de Henares, Madrid, Spain

2 Instituto de Catálisis y Petroleoquímica, ICP-CSIC, Marie Curie 2, 28049 Madrid, Spain

Corresponding authors: [laura.valenzuela@uah.es](mailto:laura.valenzuela@uah.es); [ana.iglesias@icp.csic.es](mailto:ana.iglesias@icp.csic.es)

#### **Contents:**

Figure S1. Optical microscope images (100x magnification) of ZnO, ZnO-rGO and rGO functionalised surfaces.

Figure S2. Raman spectrum of commercial GO (Graphenea, Spain).

Figure S3. Intensity colour maps of the Raman band at 1375 cm<sup>-1</sup> corresponding to the rGO phase in the ZnO-rGO functionalised surfaces.

Figure S4. SEM (a, d, g, h) and TEM (b, c, e, f) images of the ZnO-0.5rGO, ZnO-1.5rGO and rGO functionalised surfaces.

Table S1. Colony-forming units (log CFU cm<sup>-2</sup>) of *S. aureus* measured from the surface after bacteria-containing aerosol spraying on non-functionalised surface (control) and ZnO, ZnO-rGO and rGO functionalised surfaces.

Figure S5. Particle size distribution obtained from TEM images for ZnO and ZnO-1%rGO functionalised surfaces.

Figure S6. Live/Dead and FilmTracer SYPRO Ruby Biofilm Matrix Stain of *S. aureus* on non-functionalised (control) and ZnO-rGO functionalised surfaces upon Winter-Fall irradiation, L(+).

Figure S7. Live/Dead and FilmTracer SYPRO Ruby Biofilm Matrix Stain of *S. aureus* on rGO functionalised surfaces in absence of irradiation, L(-), upon Winter-Fall irradiation, L(+), and upon Summer-Spring irradiation, L(++).

Figure S8. Solubility of zinc ions ( $Zn^{2+}$ ) from ZnO and ZnO-1.0rGO functionalised surfaces in Milli-Q water at 37°C over time.

Figure S9. SEM images of *S. aureus* on non-functionalised surfaces and ZnO and ZnO-1.0rGO functionalised surfaces upon Summer-Spring, L(++), irradiation for four consecutive cycles.

Figure S10. Scheme showing mechanism of antibacterial action.

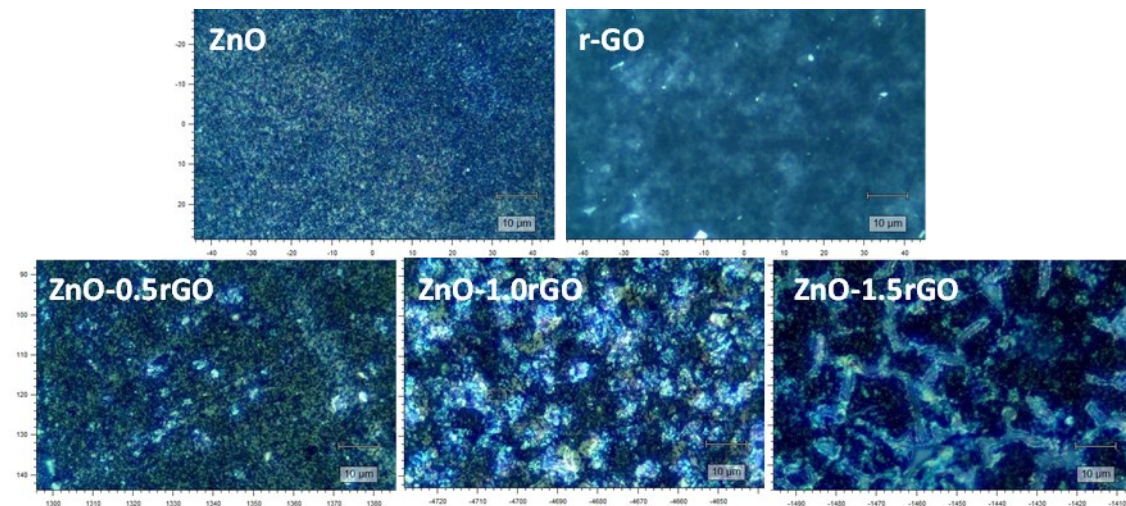

Figure S1. Optical microscope images (100x magnification) of ZnO, ZnO-rGO and rGO functionalised surfaces.

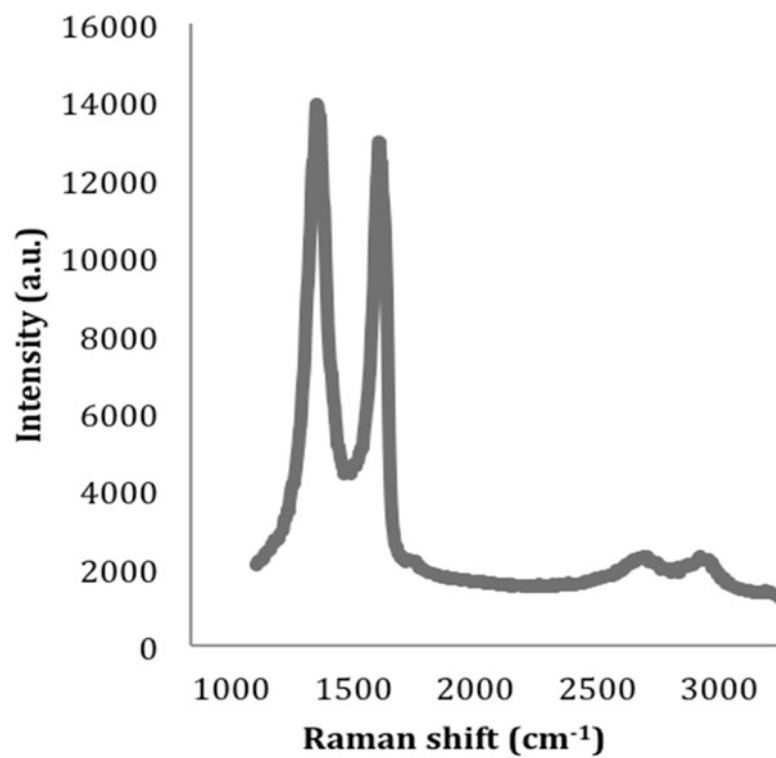

Figure S2. Raman spectrum of commercial GO (Graphenea, Spain).

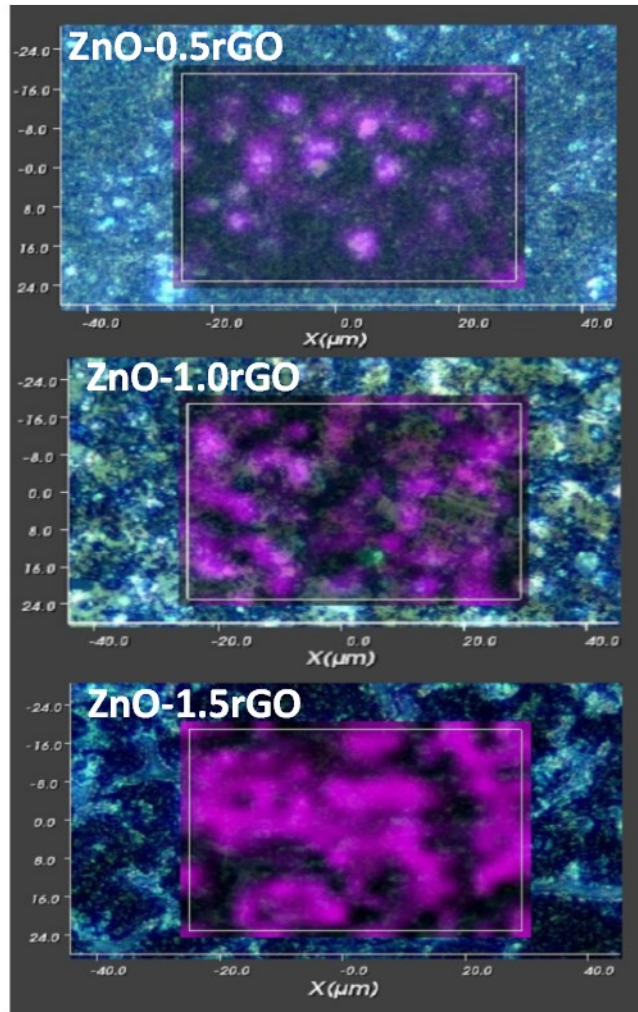

Figure S3. Intensity colour maps of the Raman band at 1375 cm<sup>-1</sup> corresponding to the rGO phase in the ZnO-rGO functionalised surfaces.

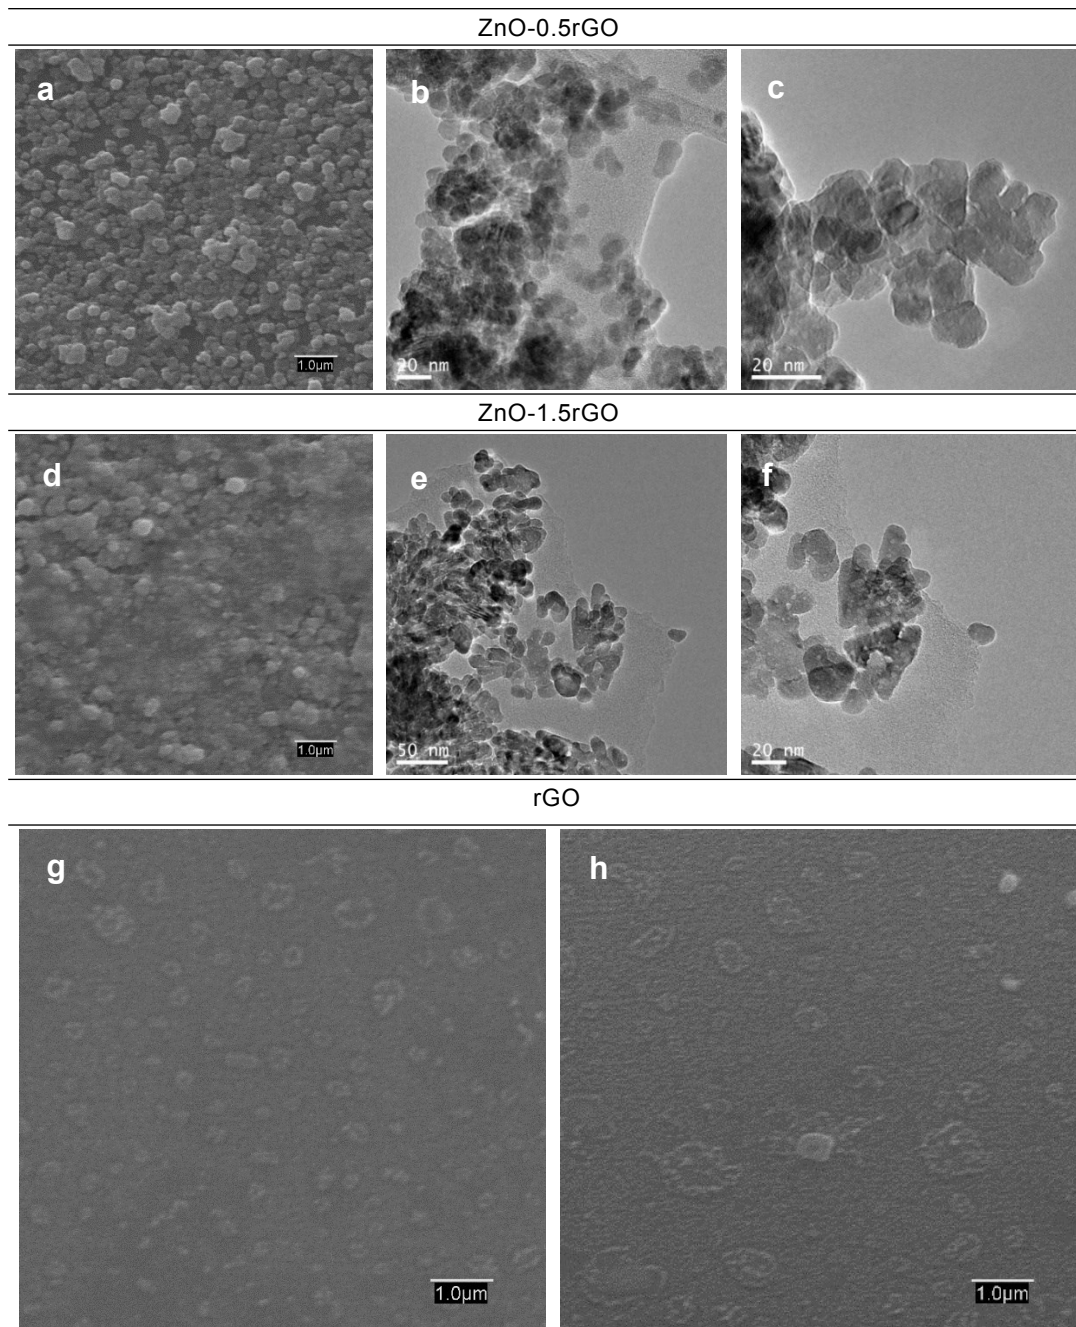

Figure S4. SEM (a, d, g, h) and TEM (b, c, e, f) images of the ZnO-0.5rGO, ZnO-1.5rGO and rGO functionalised surfaces.

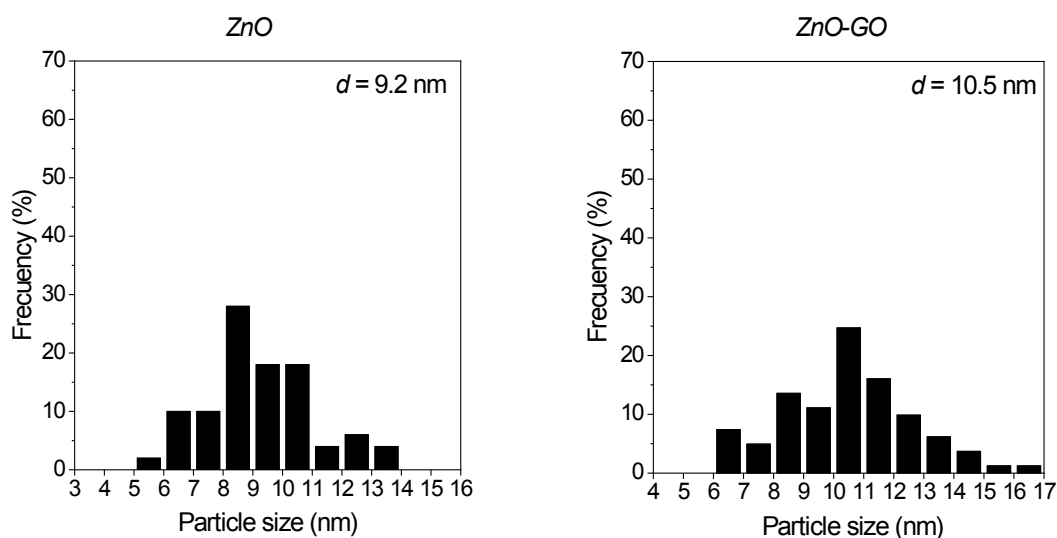

Figure S5. Particle size distribution obtained from TEM images for ZnO and ZnO-1%rGO functionalised surfaces.

Table S1. Colony-forming units ( $\log$  CFU  $\text{cm}^{-2}$ ) of *S. aureus* measured from the surface after bacteria-containing aerosol spraying on non-functionalized (control) and ZnO, ZnO-rGO and rGO functionalised surfaces.

|                   | No irradiation<br>L(-) | Winter irradiation<br>L(+) | Summer irradiation<br>L(++) |
|-------------------|------------------------|----------------------------|-----------------------------|
| <b>Control</b>    | 6.81 $\pm$ 0.30        | 6.43 $\pm$ 0.34            | 5.62 $\pm$ 0.31             |
| <b>ZnO</b>        | 4.20 $\pm$ 0.62        | 3.18 $\pm$ 0.07            | 2.97 $\pm$ 0.43             |
| <b>ZnO-0.5rGO</b> | 4.55 $\pm$ 0.23        | 3.91 $\pm$ 0.53            | 2.77 $\pm$ 0.54             |
| <b>ZnO-1.0rGO</b> | 4.15 $\pm$ 0.52        | 3.24 $\pm$ 0.45            | 1.88 $\pm$ 0.45             |
| <b>ZnO-1.5rGO</b> | 4.45 $\pm$ 0.50        | 4.15 $\pm$ 0.46            | 3.20 $\pm$ 0.21             |
| <b>rGO</b>        | 6.97 $\pm$ 0.55        | 7.02 $\pm$ 0.33            | 6.08 $\pm$ 0.31             |

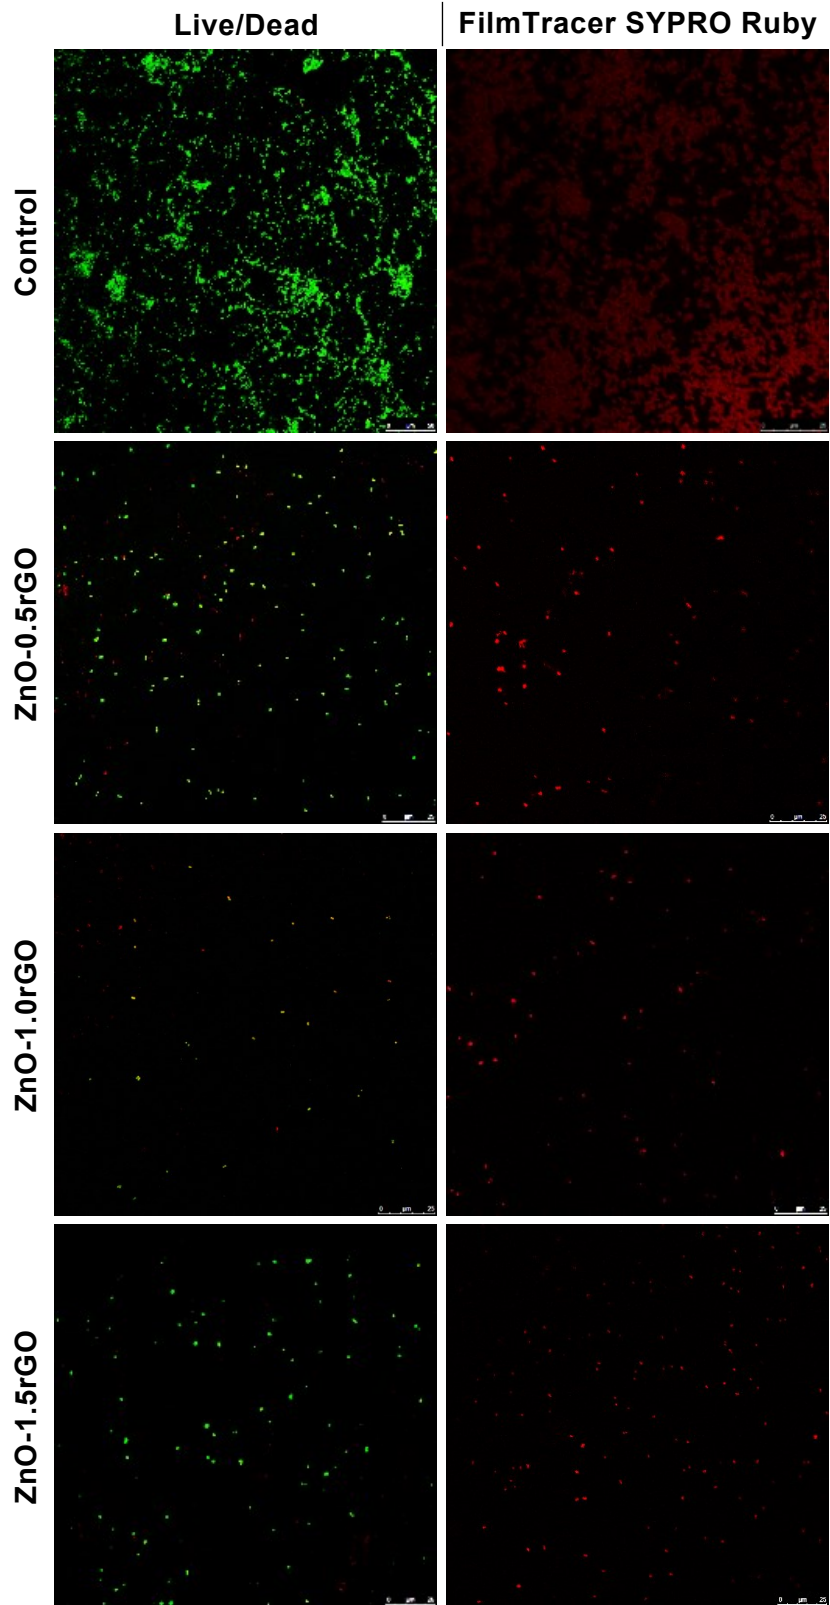



Figure S6. Live/Dead and FilmTracer SYPRO Ruby Biofilm Matrix Stain of *S. aureus* on non-functionalised (control) and ZnO-rGO functionalised surfaces upon Winter-Fall irradiation, L(+).

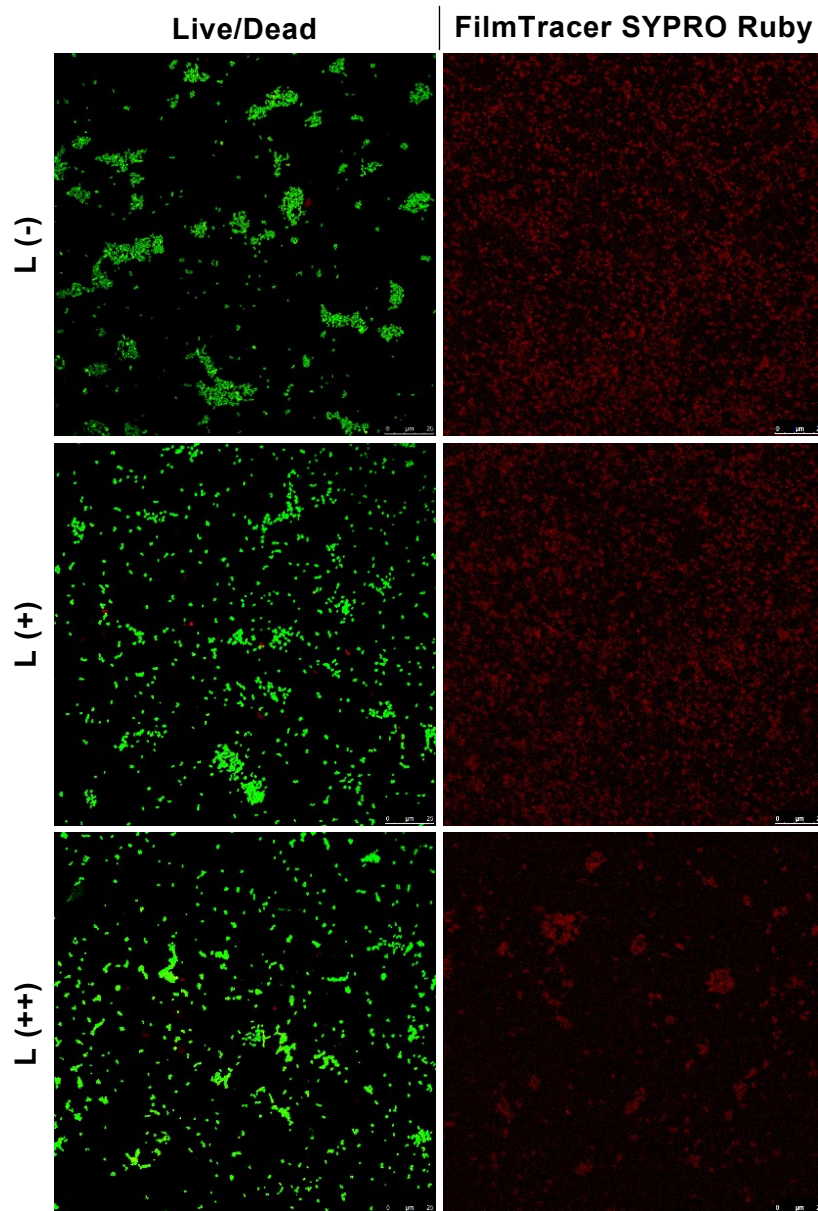

Figure S7. Live/Dead and FilmTracer SYPRO Ruby Biofilm Matrix Stain of *S. aureus* on rGO functionalised surfaces in the absence of irradiation, L(-), upon Winter-Fall irradiation, L(+), and upon Summer-Spring irradiation, L(++).



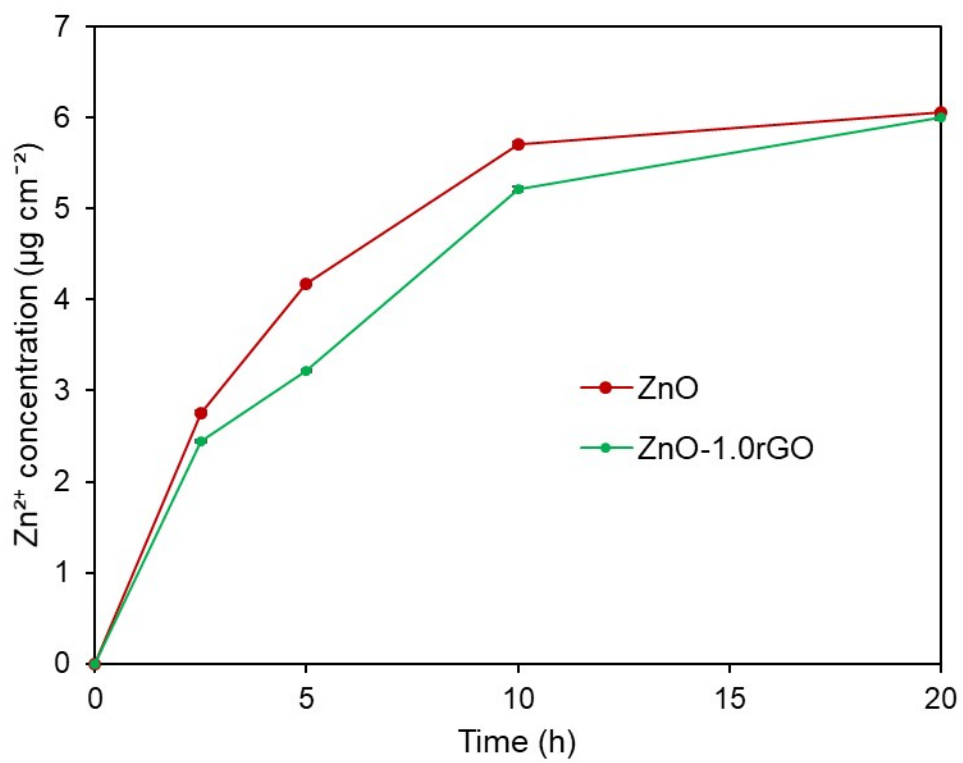

Figure S8. Solubility of zinc ions ( $\text{Zn}^{2+}$ ) from ZnO and ZnO-1.0rGO functionalized surfaces in Milli-Q water at 37°C over time.

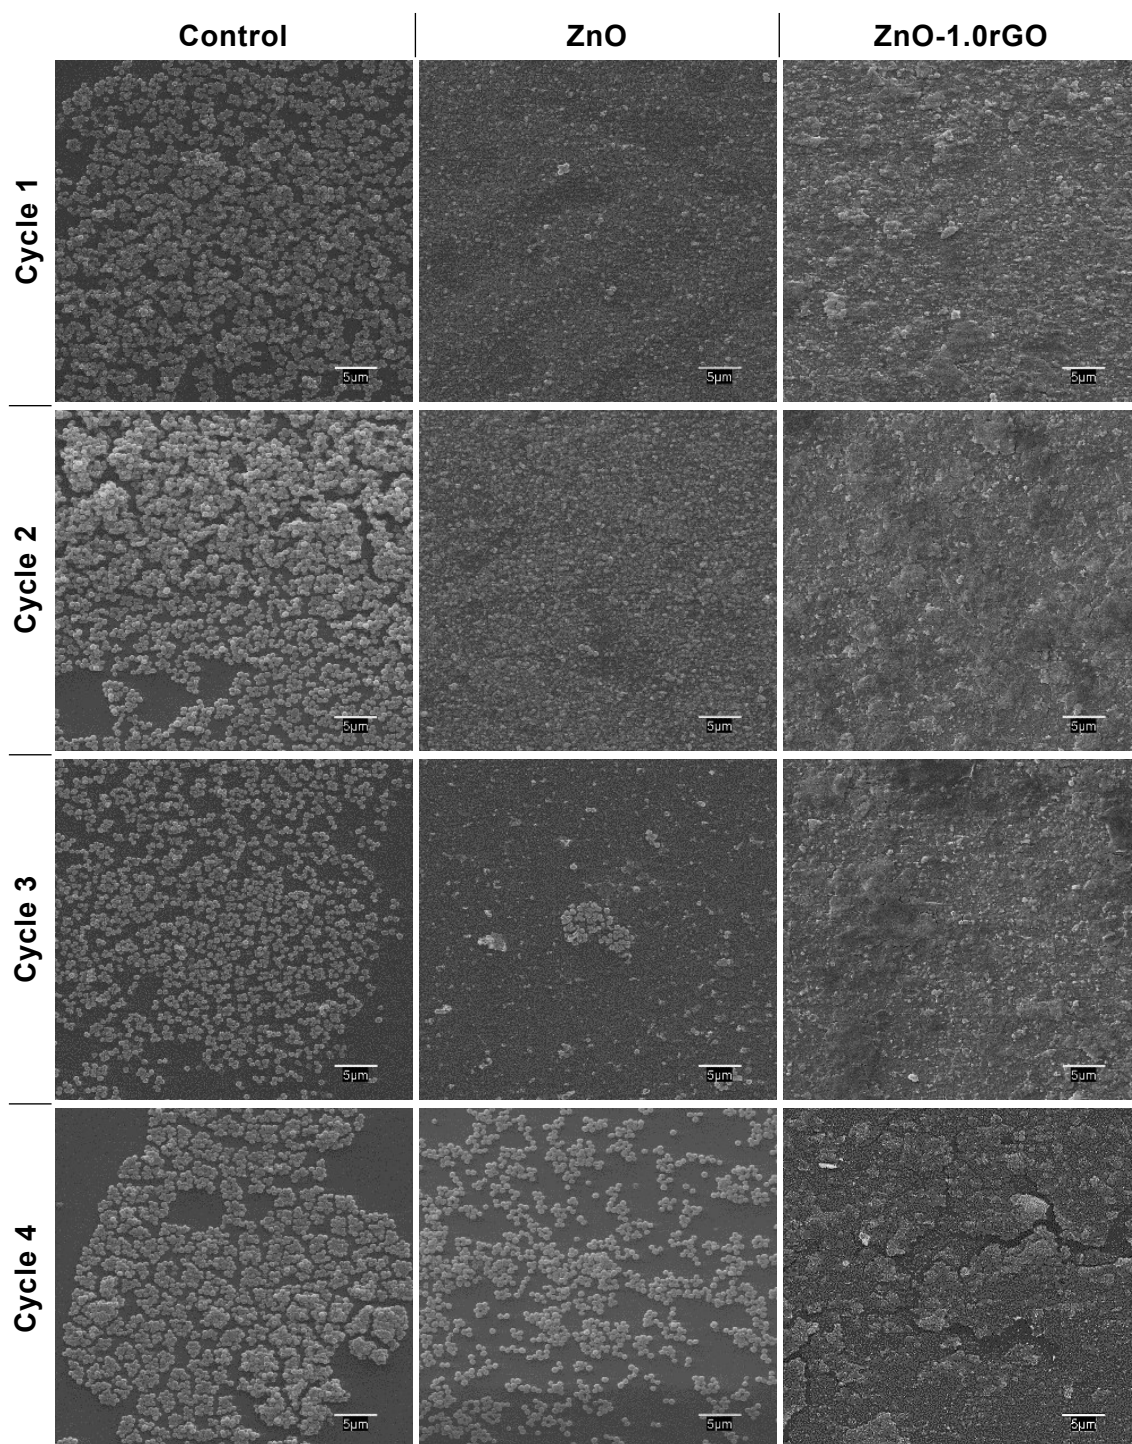

Figure S9. SEM images of *S. aureus* on non-functionalised surfaces and ZnO and ZnO-1.0rGO functionalised surfaces upon Summer-Spring, L(++), irradiation for four consecutive cycles.

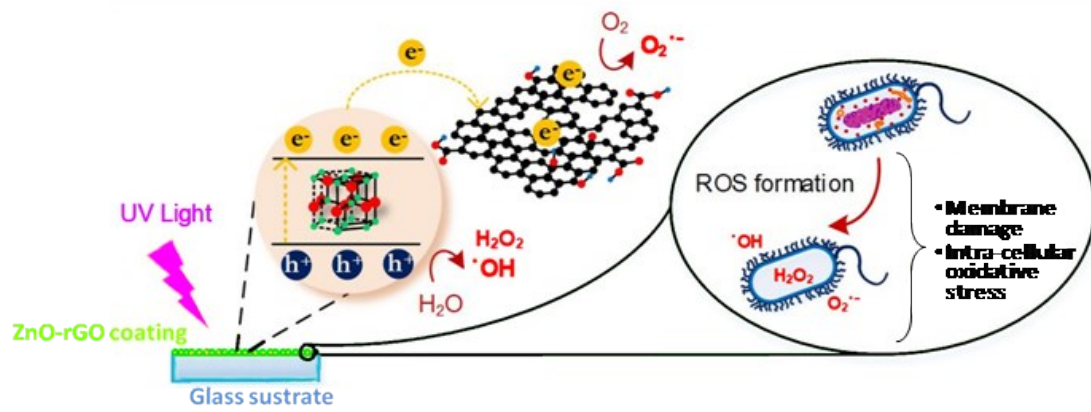

Figure S10. Schematic representation of the antibacterial action mechanism.
